# Supplementary material for: Cardiovascular events in hyperuricemia population and a cardiovascular benefit-risk assessment of urate-lowering therapies: a systematic review and meta-analysis
Source: PubMed Central journal article supplement — Chin Med J (Engl). 2020 Apr 20;133(8):982–93. doi: 10.1097/CM9.0000000000000682 (PMC7176444; doi:10.1097/cm9.0000000000000682), 2020-04-20
Supplement: cm9-133-0982-s001.pdf [file cm9-133-0982-s001.pdf]

**Supplementary Figure 1:** Methodological quality assessment of included randomized controlled trials treating hyperuricemia and gout with urate-lowering therapies.

|                 | Random sequence generation (selection bias) | Allocation concealment (selection bias) | Blinding of participants and personnel (performance bias) | Blinding of outcome assessment (detection bias) | Incomplete outcome data (attrition bias) | Selective reporting (reporting bias) | Other bias |
|-----------------|---------------------------------------------|-----------------------------------------|-----------------------------------------------------------|-------------------------------------------------|------------------------------------------|--------------------------------------|------------|
| Becker,2009     | ?                                           | ?                                       | ?                                                         | ?                                               | +                                        | ?                                    | +          |
| Becker,2010     | ?                                           | ?                                       | +                                                         | +                                               | +                                        | ?                                    | +          |
| Dalbeth,2017    | ?                                           | ?                                       | +                                                         | +                                               | +                                        | ?                                    | +          |
| Givertz,2015    | +                                           | ?                                       | +                                                         | +                                               | +                                        | ?                                    | +          |
| Goicoechea,2015 | ?                                           | ?                                       | +                                                         | ?                                               | +                                        | ?                                    | +          |
| Huang,2014      | +                                           | +                                       | +                                                         | +                                               | +                                        | ?                                    | +          |
| Jiang,2014      | ?                                           | ?                                       | +                                                         | +                                               | ?                                        | ?                                    | ?          |
| Kimura,2018     | +                                           | +                                       | +                                                         | +                                               | +                                        | +                                    | ?          |
| Lu,2016         | +                                           | ?                                       | ?                                                         | ?                                               | +                                        | ?                                    | ?          |
| Nong,2018       | ?                                           | ?                                       | ?                                                         | ?                                               | +                                        | ?                                    | ?          |
| Saag,2016       | +                                           | +                                       | +                                                         | +                                               | +                                        | +                                    | ?          |
| Saag,2019       | +                                           | +                                       | +                                                         | +                                               | +                                        | +                                    | ?          |
| Schumacher,2008 | -                                           | ?                                       | +                                                         | +                                               | +                                        | ?                                    | +          |
| Tang,2017       | -                                           | ?                                       | ?                                                         | ?                                               | +                                        | ?                                    | ?          |
| Tuta,2014       | ?                                           | ?                                       | ?                                                         | ?                                               | ?                                        | ?                                    | ?          |
| Wang,2013       | ?                                           | ?                                       | +                                                         | +                                               | +                                        | ?                                    | +          |
| White,2018      | ?                                           | ?                                       | +                                                         | +                                               | +                                        | +                                    | +          |

**Supplementary Figure 2:** Egger publication bias plot (A) and sensitivity analysis result (B) of comparison between hyperuricemia and non-hyperuricemia in MACE. Egger publication bias plot (C) and sensitivity analysis result (D) of comparison between hyperuricemia and non-hyperuricemia in CVE. CVE: Cardiovascular events; MACE: Major adverse cardiovascular events.

A

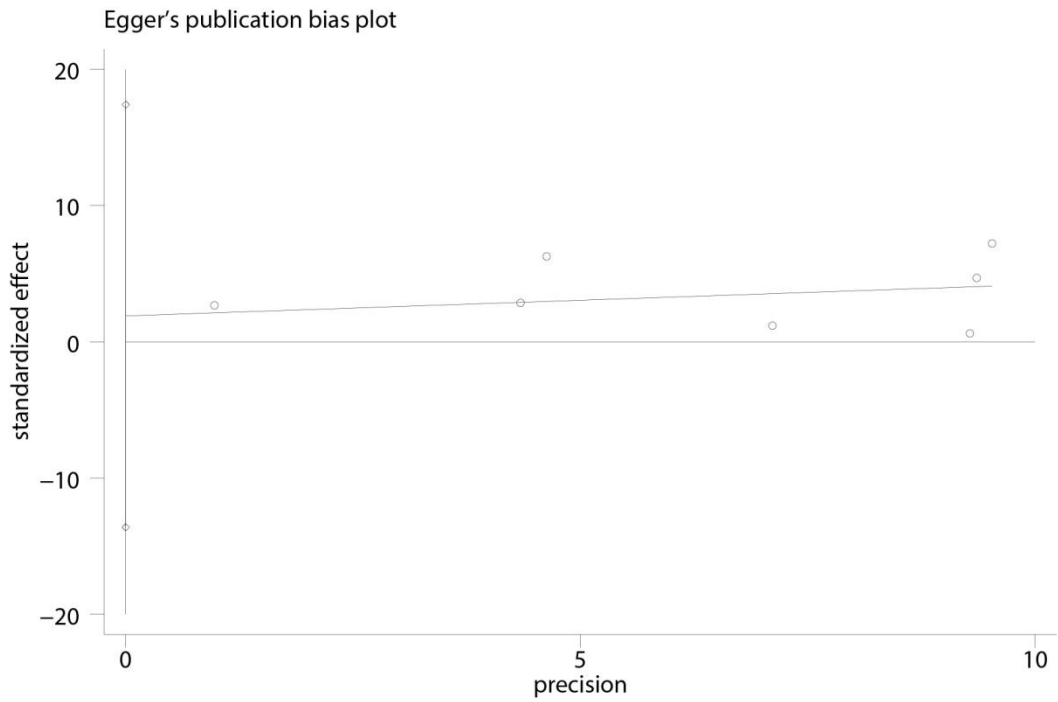

B

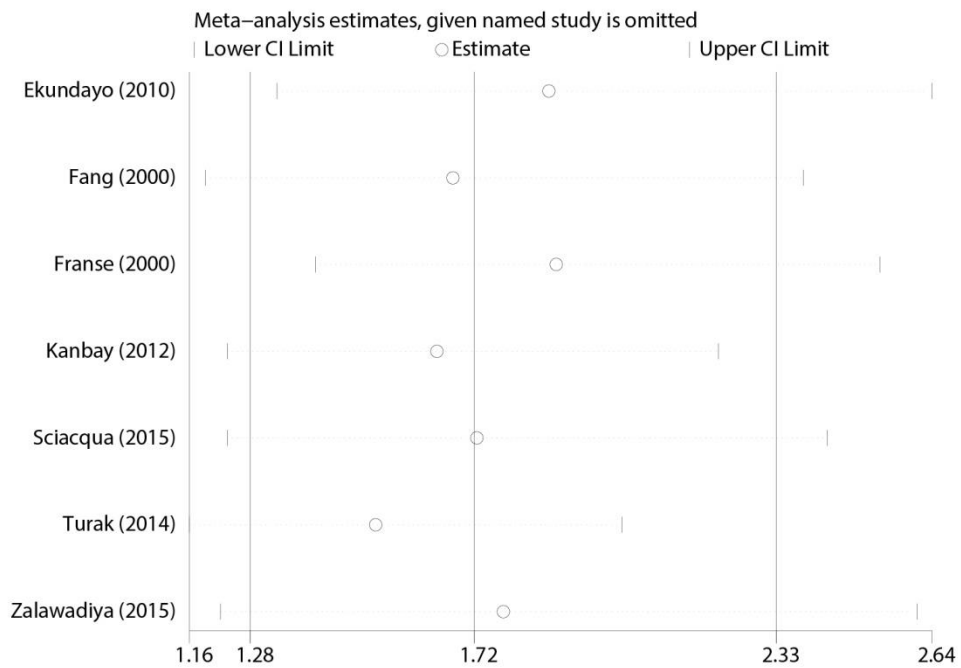

C

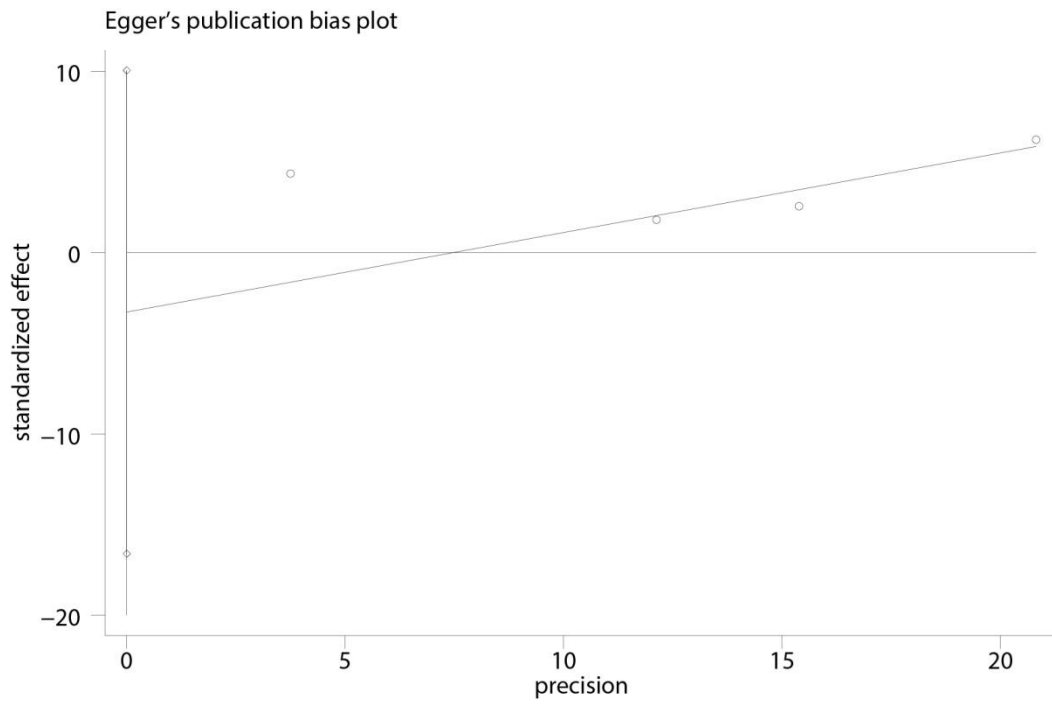

D

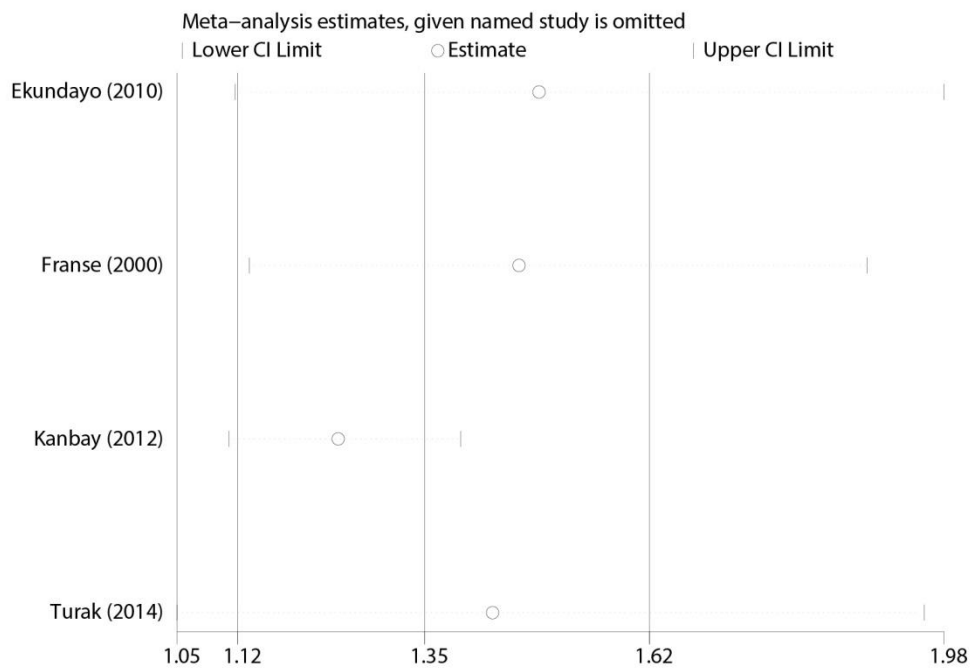

**Supplementary Figure 3:** Egger publication bias plot (A) and sensitivity analysis result (B) of comparison between XOIs and non-XOIs/placebo in MACE with low CV risk. Egger publication bias plot (C) and sensitivity analysis result (D) of comparison between XOIs and non-XOIs/placebo in CVE with low CV risk. CV: Cardiovascular; CVE: Cardiovascular events; MACE: Major adverse cardiovascular events, XOIs: Xanthine oxidase inhibitors.

A

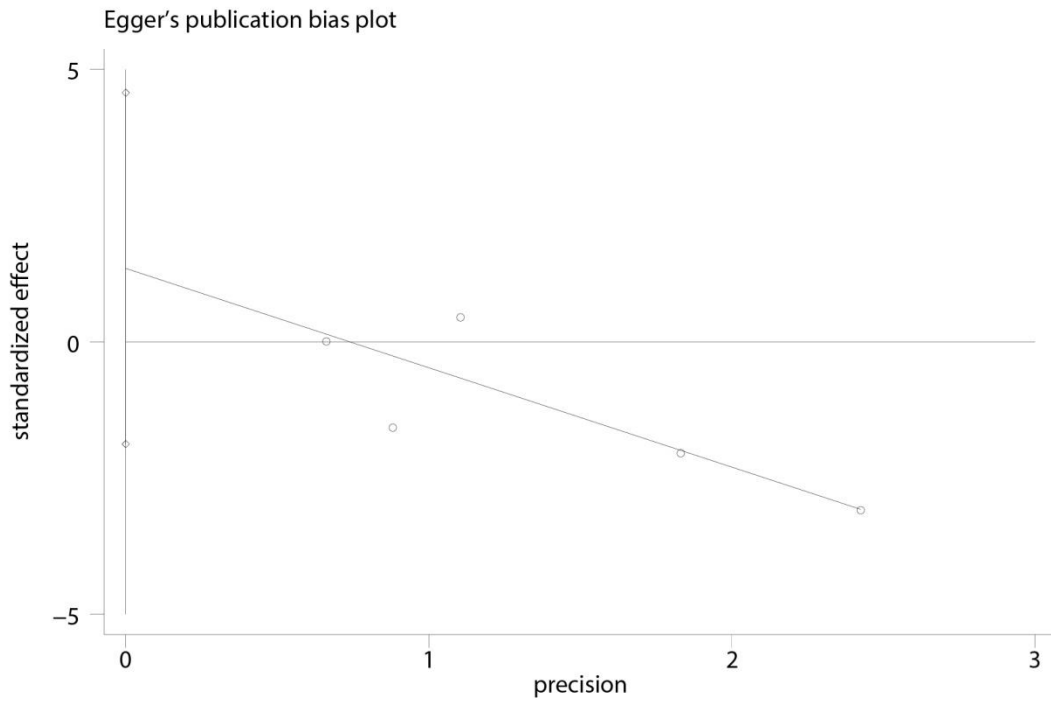

B

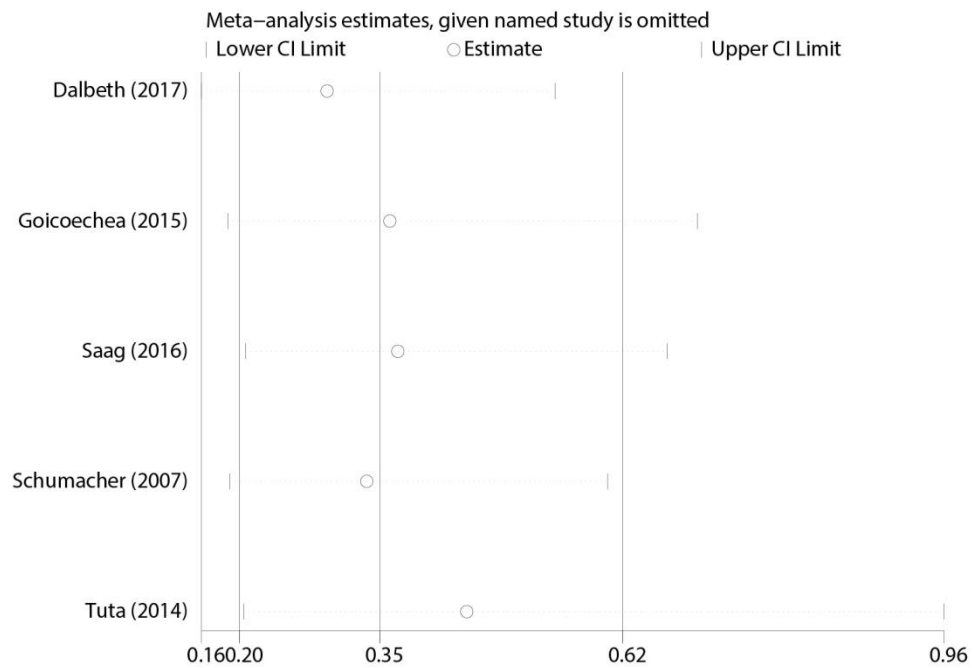

C

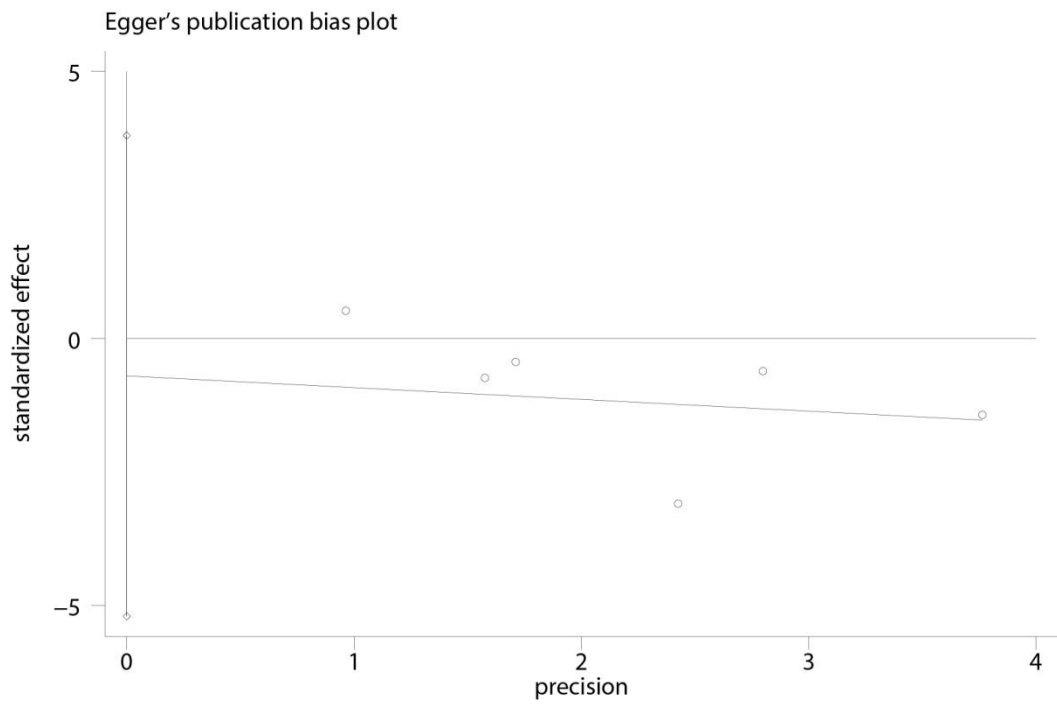

D

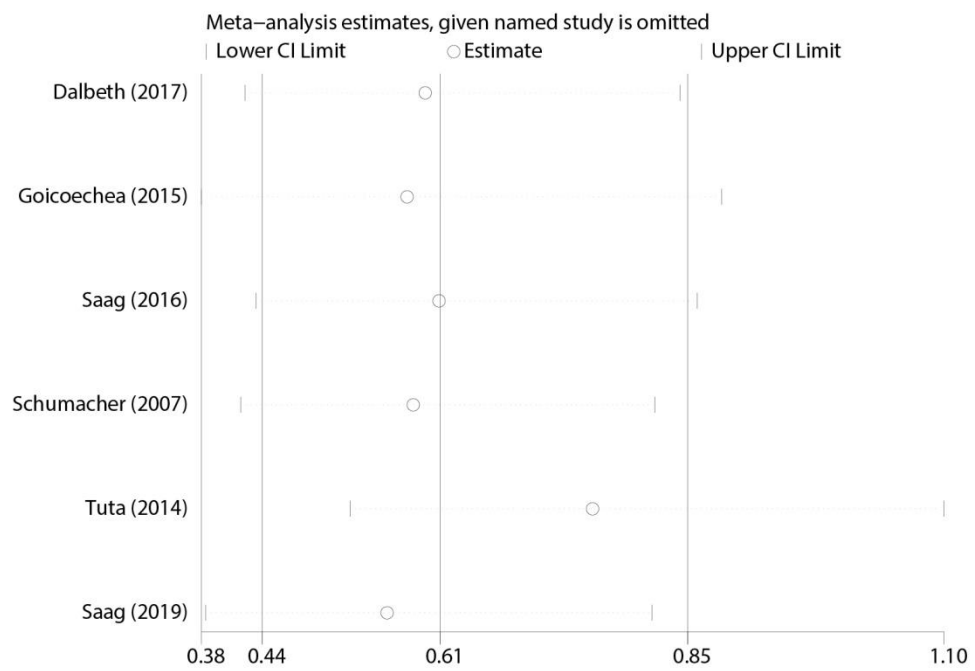

**Supplementary Figure 4:** Egger publication bias plot (A) and sensitivity analysis result (B) of comparison between febuxostat and allopurinol in MACE with low CV risk. Egger publication bias plot (C) and sensitivity analysis result (D) of comparison between febuxostat and allopurinol in CVE with low CV risk. CV: Cardiovascular; CVE: Cardiovascular events; MACE: Major adverse cardiovascular events.

A

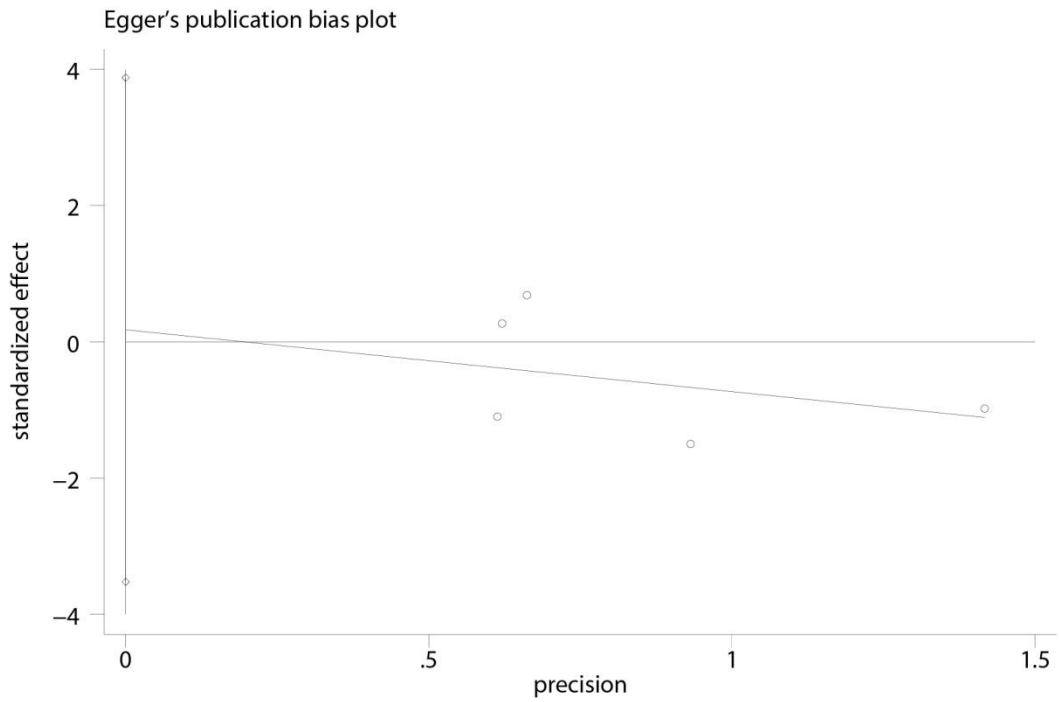

B

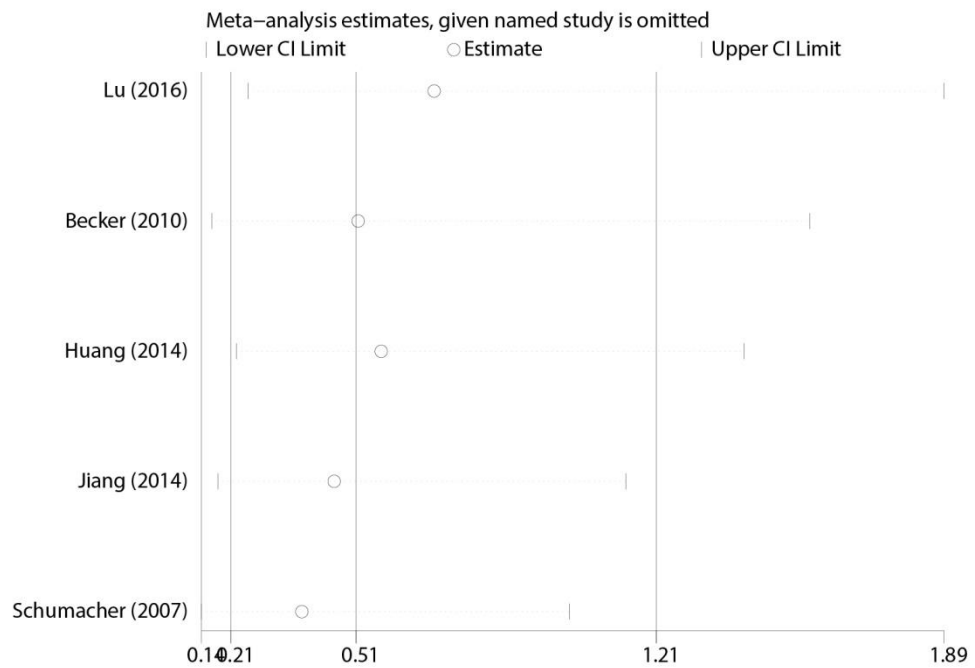

C

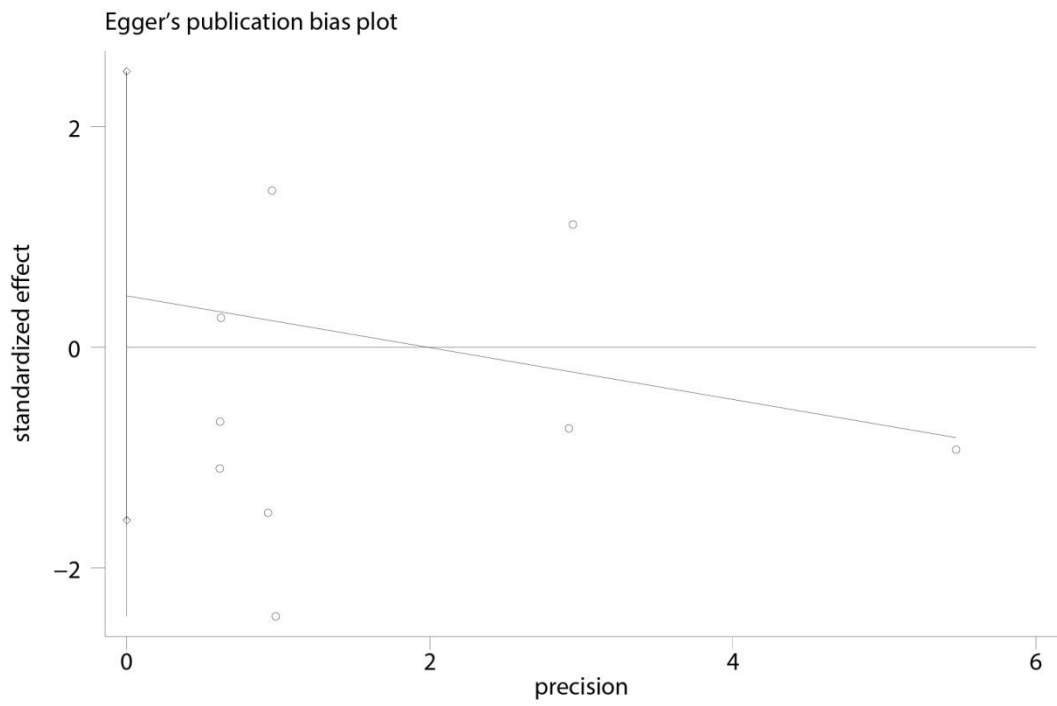

D

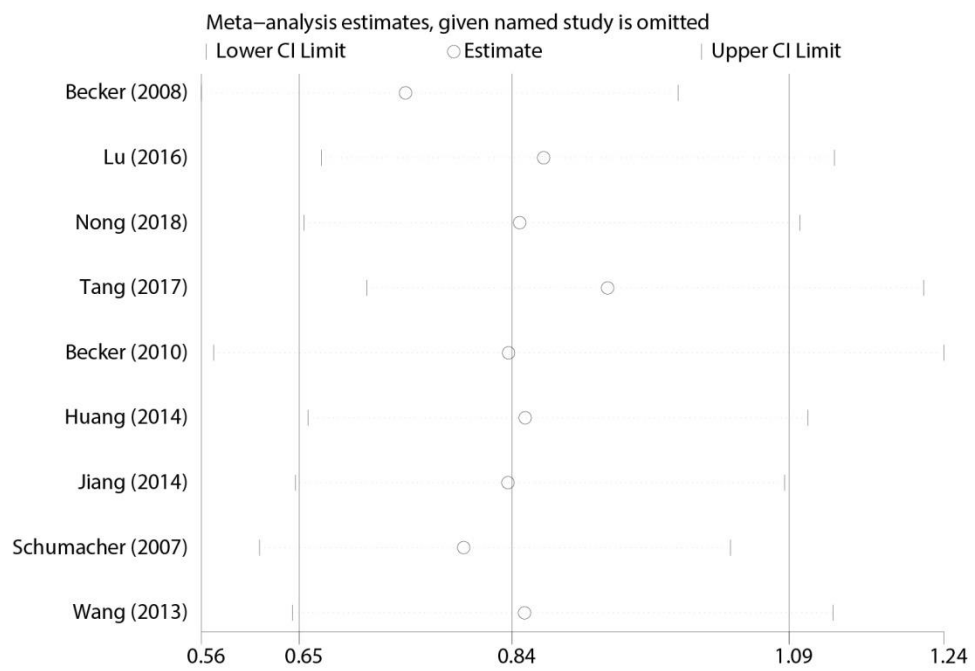

**Supplementary Figure 5:** Subgroup meta-analysis based on short-term (<12 m) and long-term (≥12 m) of MACE (A) and CVE (B) in comparison between XOIs and placebo. Subgroup meta-analysis based on short-term (<12 m) and long-term (≥12 m) of MACE (C) and CVE (D) in comparison between allopurinol and febuxostat. XOIs: Xanthine oxidase inhibitors; MACE: major adverse cardiovascular events, CVE: cardiovascular events.

A

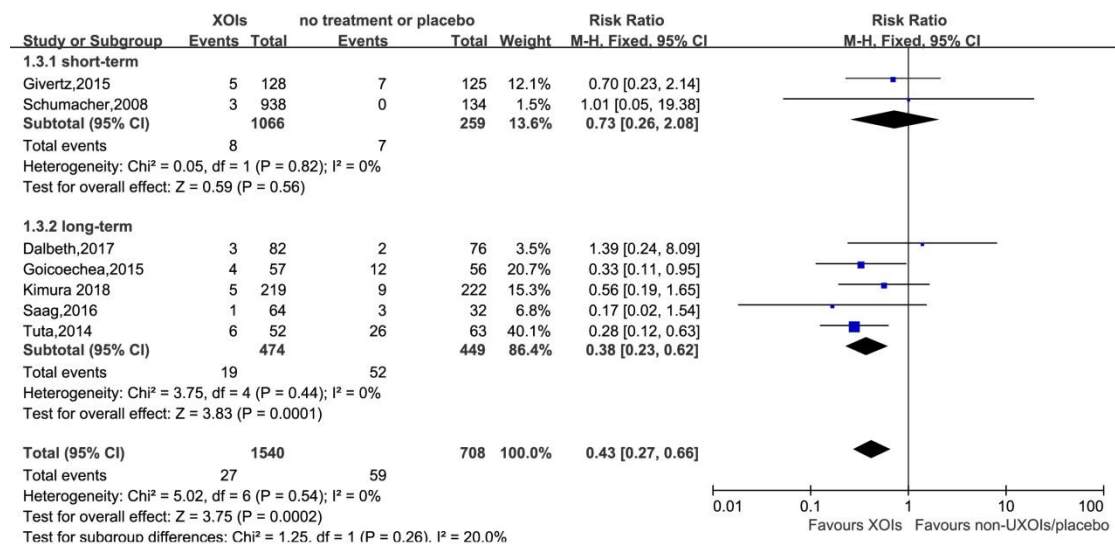

B

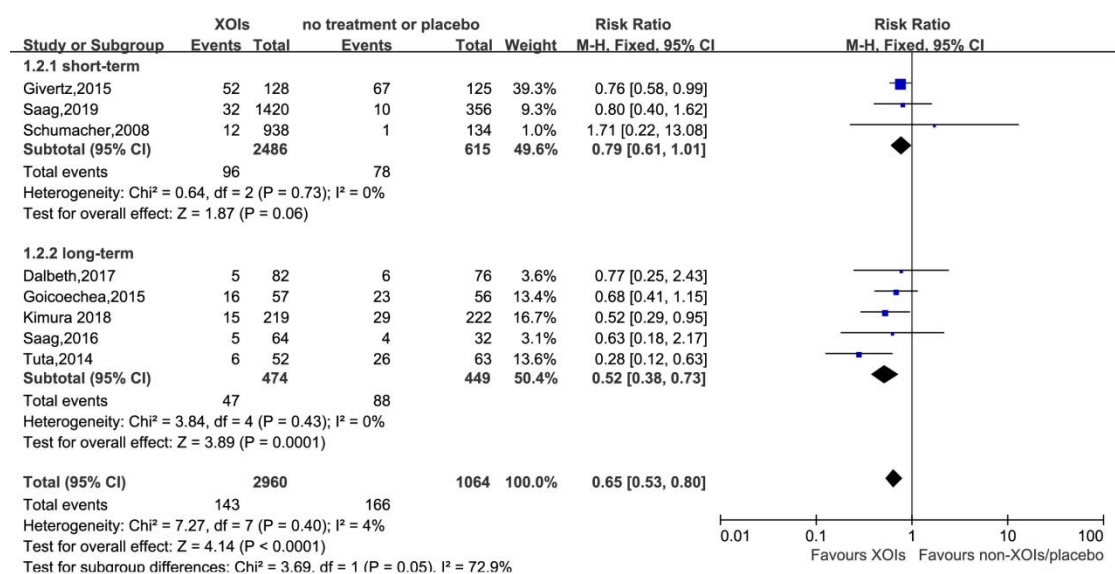



C

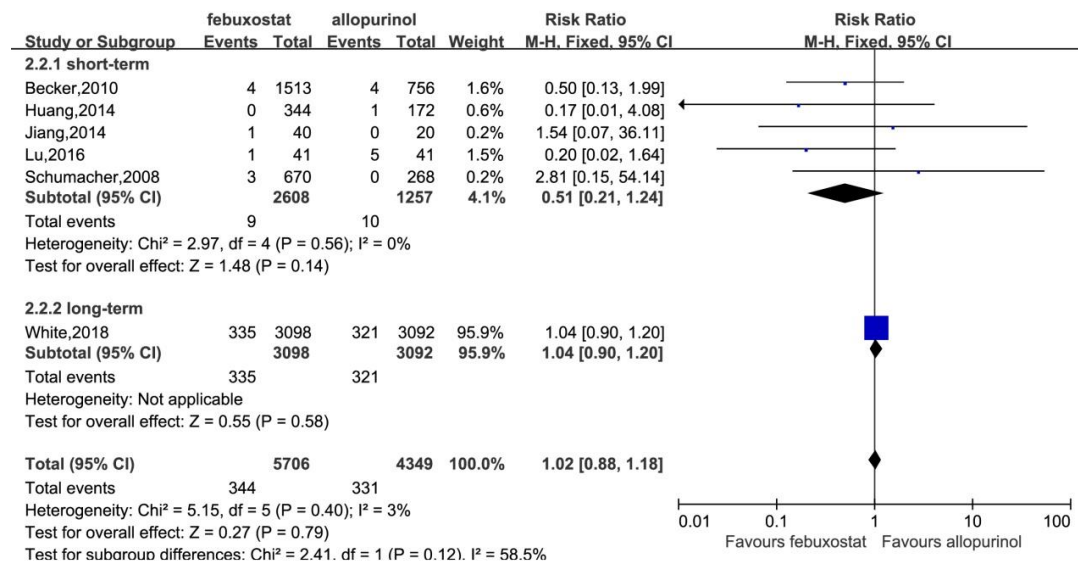

D

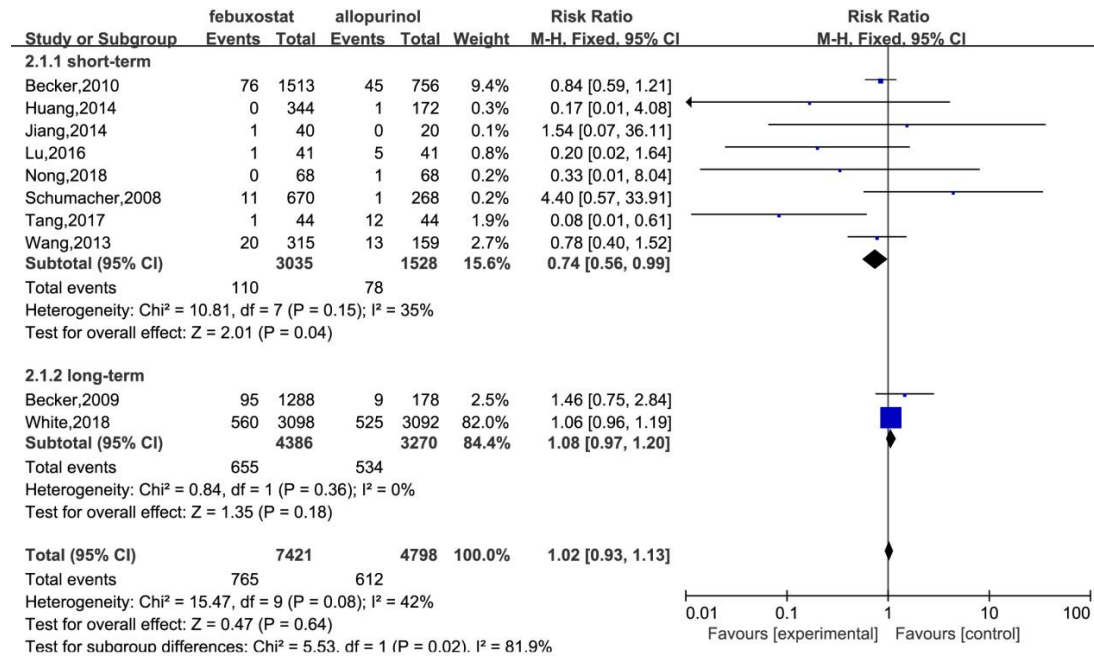

**Supplementary Table 1:** Methodological quality assessment of prospective cohort studies treating hyperuricemia and gout with uric-lowering therapies.

| Authors    | Year | Selection |   |   |   | Comparability | Outcome Assessment |   |   | Score |
|------------|------|-----------|---|---|---|---------------|--------------------|---|---|-------|
|            |      | 1         | 2 | 3 | 4 | 5             | 6                  | 7 | 8 |       |
| Ekundayo   | 2010 | *         | * | * | * | **            |                    | * |   | 7     |
| Fang       | 2000 | *         | * | * | * | *             | *                  | * |   | 7     |
| Franse     | 2000 |           | * | * | * |               |                    | * |   | 4     |
| Kanbay     | 2012 |           | * | * | * |               | *                  |   |   | 4     |
| Sciacqua   | 2015 |           | * | * | * | **            | *                  | * |   | 7     |
| Turak      | 2014 | *         | * | * | * |               | *                  |   |   | 5     |
| Zalawadiya | 2015 | *         | * | * | * |               | *                  | * |   | 6     |
